# Supplementary material for: High expression of insulinoma‐associated protein 1 (INSM1) distinguishes colorectal mixed and pure neuroendocrine carcinomas from conventional adenocarcinomas with diffuse expression of synaptophysin
Source: PubMed Central journal article supplement — J Pathol Clin Res. 2023 Aug 22;9(6):498–509. doi: 10.1002/cjp2.339 (PMC10556265; doi:10.1002/cjp2.339), 2023-08-22
Supplement: CJP2-9-498-s001.pdf [file CJP2-9-498-s001.pdf]

**High expression of insulinoma-associated protein 1 (INSM1) distinguishes colorectal mixed and pure neuroendocrine carcinomas from conventional adenocarcinomas with diffuse expression of synaptophysin**

A-S Litmeyer, B Konukiewitz *et al.*, *J Pathol Clin Res*, <https://doi.org/10.1002/cjp2.339>

**Supplementary Tables S1–S8**

**Table S1.** Correlation between INSM1 expression and expression of chromogranin A in conventional adenocarcinomas

|                                                                      | <b>INSM1 negative<br/>(IRS 0-1)</b> | <b>INSM1 weak<br/>(IRS 2-3)</b> | <b>INSM1 moderate<br/>(IRS 4-8)</b> | <b>Total number</b> | <b><i>p</i> value</b> |
|----------------------------------------------------------------------|-------------------------------------|---------------------------------|-------------------------------------|---------------------|-----------------------|
| <b>Conventional adenocarcinoma chromogranin A negative (IRS 0-1)</b> | 816                                 | 92                              | 9                                   | <b>917</b>          |                       |
| <b>Conventional adenocarcinoma chromogranin A weak (IRS 2-3)</b>     | 68                                  | 36                              | 2                                   | <b>106</b>          |                       |
| <b>Conventional adenocarcinoma chromogranin A moderate (IRS 4-8)</b> | 4                                   | 5                               | 1                                   | <b>10</b>           |                       |
| <b>Total number</b>                                                  | <b>888</b>                          | <b>133</b>                      | <b>12</b>                           | <b>1033</b>         | <b>&lt;0.001</b>      |

**Table S2.** Correlation between INSM1 expression and expression of chromogranin A in MANEC/NEC

|                                                    | <b>INSM1 weak<br/>(IRS 2-3)</b> | <b>INSM1 moderate<br/>(IRS 4-8)</b> | <b>INSM1 strong<br/>(IRS 9-12)</b> | <b>Total number</b> | <b><i>p</i> value</b> |
|----------------------------------------------------|---------------------------------|-------------------------------------|------------------------------------|---------------------|-----------------------|
| <b>NEC/MANEC chromogranin A negative (IRS 0-1)</b> | 1                               | 4                                   | 3                                  | <b>8</b>            |                       |
| <b>NEC/MANEC chromogranin A weak (IRS 2-3)</b>     | 1                               | 1                                   | 4                                  | <b>6</b>            |                       |
| <b>NEC/MANEC chromogranin A moderate (IRS 4-8)</b> | 0                               | 1                                   | 1                                  | <b>2</b>            |                       |
| <b>NEC/MANEC chromogranin A strong (IRS 9-12)</b>  | 0                               | 1                                   | 4                                  | <b>5</b>            |                       |
| <b>Total number</b>                                | <b>2</b>                        | <b>7</b>                            | <b>12</b>                          | <b>21</b>           | <b>0.707</b>          |

**Table S3.** Survival associations of INSM1 expression groups among conventional adenocarcinomas including mean survival times

|                                                      | Overall n (%) | Mean overall survival (SE) [months] | <i>p</i> value | Mean disease specific survival (SE) [months] | <i>p</i> value | Mean disease free survival (SE) [months] | <i>p</i> value |
|------------------------------------------------------|---------------|-------------------------------------|----------------|----------------------------------------------|----------------|------------------------------------------|----------------|
| <b>INSM1 expression groups</b>                       |               |                                     | <b>0.849</b>   |                                              | <b>0.273</b>   |                                          | <b>0.884</b>   |
| Conventional Adenocarcinoma INSM1 negative (IRS 0-1) | 888 (86.0%)   | 79.04 (1.7)                         |                | 87.08 (1.7)                                  |                | 82.71 (1.8)                              |                |
| Conventional Adenocarcinoma INSM1 weak (IRS 2-3)     | 133 (12.9%)   | 81.98 (4.3)                         |                | 94.47 (4.2)                                  |                | 83.95 (4.7)                              |                |
| Conventional Adenocarcinoma INSM1 moderate (IRS 4-8) | 12 (1.2%)     | 80.93 (15.5)                        |                | 89.01 (15.3)                                 |                | 74.49 (17.4)                             |                |

**Table S4.** Survival associations of INSM1 expression groups among conventional adenocarcinomas compared to colorectal MANEC/NEC including mean survival times

|                                                      | Overall n (%) | Mean overall survival (SE) [months] | <i>p</i> value   | Mean disease specific survival (SE) [months] | <i>p</i> value   | Mean disease free survival (SE) [months] | <i>p</i> value   |
|------------------------------------------------------|---------------|-------------------------------------|------------------|----------------------------------------------|------------------|------------------------------------------|------------------|
| <b>INSM1 expression</b>                              |               |                                     | <b>&lt;0.001</b> |                                              | <b>&lt;0.001</b> |                                          | <b>&lt;0.001</b> |
| Conventional Adenocarcinoma INSM1 negative (IRS 0-1) | 888 (84.3%)   | 79.04 (1.7)                         |                  | 87.08 (1.7)                                  |                  | 82.71 (1.8)                              |                  |
| Conventional Adenocarcinoma INSM1 weak (IRS 2-3)     | 133 (12.6%)   | 81.98 (4.3)                         |                  | 94.47 (4.2)                                  |                  | 83.95 (4.7)                              |                  |
| Conventional Adenocarcinoma INSM1 moderate (IRS 4-8) | 12 (1.1%)     | 80.93 (15.5)                        |                  | 89.01 (15.3)                                 |                  | 74.49 (17.4)                             |                  |
| MANEC/NEC                                            | 21 (2.1%)     | 26.51 (6.2)                         |                  | 26.51 (6.2)                                  |                  | 22.99 (6.1)                              |                  |

**Table S5.** Multivariate analysis for overall survival including INSM1 expression groups in conventional adenocarcinomas compared to MANECs including UICC stage, WHO-grade, microsatellite status, resection status, age, and gender

|                                                                            |                                                             | HR (OS) | Lower CI (95%) | Upper CI (95%) | p value          |
|----------------------------------------------------------------------------|-------------------------------------------------------------|---------|----------------|----------------|------------------|
| <b>INSM1 expression groups in conventional adenocarcinoma vs MANEC/NEC</b> | <i>Conventional adenocarcinoma INSM1 negative (IRS 0-1)</i> | 1       |                |                | <b>0.014</b>     |
|                                                                            | <i>Conventional adenocarcinoma INSM1 low (IRS 2-3)</i>      | 0.978   | 0.727          | 1.316          |                  |
|                                                                            | <i>Conventional adenocarcinoma INSM1 moderate (IRS 4-8)</i> | 0.625   | 0.232          | 1.685          |                  |
|                                                                            | <i>MANEC/NEC</i>                                            | 2.167   | 1.167          | 4.023          |                  |
| <b>UICC Stage</b>                                                          | <i>I</i>                                                    | 1       |                |                | <b>&lt;0.001</b> |
|                                                                            | <i>II</i>                                                   | 1.481   | 1.068          | 2.052          |                  |
|                                                                            | <i>III</i>                                                  | 1.653   | 1.194          | 2.288          |                  |
|                                                                            | <i>IV</i>                                                   | 4.198   | 2.931          | 6.014          |                  |
| <b>Resection status</b>                                                    | <i>R0</i>                                                   | 1       |                |                | <b>&lt;0.001</b> |
|                                                                            | <i>R1</i>                                                   | 1.968   | 1.352          | 2.864          |                  |
|                                                                            | <i>R2</i>                                                   | 1.975   | 1.279          | 3.050          |                  |
| <b>Microsatellite status</b>                                               | <i>Microsatellite stable</i>                                | 1       |                |                | <b>0.060</b>     |
|                                                                            | <i>Microsatellite unstable</i>                              | 0.737   | 0.536          | 1.013          |                  |
| <b>WHO Grade</b>                                                           | <i>Low grade (former G1/G2)</i>                             | 1       |                |                | <b>0.002</b>     |
|                                                                            | <i>High grade (former G3)</i>                               | 1.398   | 1.134          | 1.724          |                  |
| <b>Gender</b>                                                              | <i>Male</i>                                                 | 1       |                |                | <b>0.022</b>     |
|                                                                            | <i>Female</i>                                               | 0.790   | 0.645          | 0.967          |                  |
| <b>Age</b>                                                                 | <i>Below median</i>                                         | 1       |                |                | <b>&lt;0.001</b> |
|                                                                            | <i>Median and above</i>                                     | 1.852   | 1.520          | 2.257          |                  |

**Table S6.** Multivariate analysis for disease-free survival including INSM1 expression groups in conventional adenocarcinomas compared to MANECs including UICC stage, WHO-grade, microsatellite status, resection status, age, and gender

|                                                                            |                                                             | HR (DFS) | Lower CI (95%) | Upper CI (95%) | p-value          |
|----------------------------------------------------------------------------|-------------------------------------------------------------|----------|----------------|----------------|------------------|
| <b>INSM1 expression groups in conventional adenocarcinoma vs MANEC/NEC</b> | <i>Conventional adenocarcinoma INSM1 negative (IRS 0-1)</i> | 1        |                |                | <b>0.030</b>     |
|                                                                            | <i>Conventional adenocarcinoma INSM1 low (IRS 2-3)</i>      | 1.014    | 0.726          | 1.416          |                  |
|                                                                            | <i>Conventional adenocarcinoma INSM1 moderate (IRS 4-8)</i> | 0.782    | 0.288          | 2.127          |                  |
|                                                                            | <i>MANEC/NEC</i>                                            | 1.936    | 1.066          | 3.514          |                  |
| <b>UICC Stage</b>                                                          | <i>I</i>                                                    | 1        |                |                | <b>&lt;0.001</b> |
|                                                                            | <i>II</i>                                                   | 1.985    | 1.245          | 3.166          |                  |
|                                                                            | <i>III</i>                                                  | 3.808    | 2.449          | 5.922          |                  |
|                                                                            | <i>IV</i>                                                   | 8.618    | 5.375          | 13.818         |                  |
| <b>Resection status</b>                                                    | <i>R0</i>                                                   | 1        |                |                | <b>&lt;0.001</b> |
|                                                                            | <i>R1</i>                                                   | 2.183    | 1.496          | 3.185          |                  |
|                                                                            | <i>R2</i>                                                   | 1.567    | 1.000          | 2.456          |                  |
| <b>Microsatellite status</b>                                               | <i>Microsatellite stable</i>                                | 1        |                |                | <b>0.010</b>     |
|                                                                            | <i>Microsatellite unstable</i>                              | 0.595    | 0.401          | 0.883          |                  |
| <b>WHO Grade</b>                                                           | <i>Low grade (former G1/G2)</i>                             | 1        |                |                | <b>0.008</b>     |
|                                                                            | <i>High grade (former G3)</i>                               | 1.369    | 1.086          | 1.725          |                  |
| <b>Gender</b>                                                              | <i>Male</i>                                                 | 1        |                |                | <b>0.577</b>     |
|                                                                            | <i>Female</i>                                               | 0.939    | 0.753          | 1.171          |                  |
| <b>Age</b>                                                                 | <i>Below median</i>                                         | 1        |                |                | <b>0.097</b>     |
|                                                                            | <i>Median and above</i>                                     | 1.202    | 0.968          | 1.494          |                  |

**Table S7.** Cohort characteristics and expression of synaptophysin, chromogranin A, and INSM1 in the conventional CRC validation cohort

|                                     |                    | <b>Overall n (%)</b> |
|-------------------------------------|--------------------|----------------------|
| <b>Age</b>                          | Below median       | 135 (49%)            |
|                                     | Median and above   | 139 (51%)            |
| <b>Sex</b>                          | Male               | 153 (57%)            |
|                                     | Female             | 121 (43%)            |
| <b>Specimen type</b>                | Resection          | 274 (100%)           |
|                                     | Biopsy             | 0 (0%)               |
| <b>Expression of INSM1</b>          | Negative (IRS 0-1) | 254 (93%)            |
|                                     | Weak (IRS 2-3)     | 20 (7%)              |
|                                     | Moderate (IRS 4-8) | 0 (0%)               |
|                                     | Strong (IRS 9-12)  | 0 (0%)               |
| <b>Expression of chromogranin A</b> | Negative (IRS 0-1) | 247 (90%)            |
|                                     | Weak (IRS 2-3)     | 27 (10%)             |
|                                     | Moderate (IRS 4-8) | 0 (0%)               |
|                                     | Strong (IRS 9-12)  | 0 (0%)               |
| <b>Expression of synaptophysin</b>  | Negative           | 236 (86%)            |
|                                     | Low (1-9%)         | 23 (8%)              |
|                                     | Moderate (10-29%)  | 10 (4%)              |
|                                     | High (30-100%)     | 5 (2%)               |
| <b>pT</b>                           | 1                  | 14 (5%)              |
|                                     | 2                  | 50 (18%)             |
|                                     | 3                  | 169 (62%)            |
|                                     | 4                  | 40 (15%)             |
| <b>pN</b>                           | 0                  | 145 (53%)            |
|                                     | 1                  | 71 (25%)             |
|                                     | 2                  | 58 (21%)             |
| <b>pM</b>                           | 0                  | 215 (79%)            |
|                                     | 1                  | 59 (21%)             |
| <b>UICC Stage</b>                   | I                  | 51 (19%)             |
|                                     | II                 | 81 (29%)             |
|                                     | III                | 82 (30%)             |
|                                     | IV                 | 60 (22%)             |
| <b>WHO grade</b>                    | Low-grade          | 204 (75%)            |
|                                     | High-grade         | 70 (25%)             |
| <b>Resection margin</b>             | R0                 | 265 (97%)            |
|                                     | R1                 | 9 (3%)               |

**Table S8.** Cohort characteristics and expression of synaptophysin, chromogranin A, and INSM1 in the MANEC/NEC validation cohort

|                                     |                           | <b>Overall n (%)</b> |
|-------------------------------------|---------------------------|----------------------|
| <b>Age</b>                          | Below median              | 8 (42%)              |
|                                     | Median and above          | 11 (58%)             |
| <b>Sex</b>                          | Male                      | 10 (53%)             |
|                                     | Female                    | 9 (47%)              |
| <b>Specimen type</b>                | Resection                 | 11 (58%)             |
|                                     | Biopsy                    | 8 (42%)              |
| <b>Tumor type</b>                   | MANEC                     | 4 (21%)              |
|                                     | Large Cell NEC            | 11 (58%)             |
|                                     | Small Cell NEC            | 4 (21%)              |
| <b>Expression of INSM1</b>          | Negative (IRS 0-1)        | 0 (0%)               |
|                                     | Weak (IRS 2-3)            | 4 (21%)              |
|                                     | Moderate (IRS4-8)         | 6 (32%)              |
|                                     | Strong (IRS 9-12)         | 9 (47%)              |
| <b>Expression of chromogranin A</b> | Negative (IRS 0-1)        | 12 (63%)             |
|                                     | Weak (IRS 2-3)            | 1 (5%)               |
|                                     | Moderate (IRS4-8)         | 5 (27%)              |
|                                     | Strong (IRS 9-12)         | 1 (5%)               |
| <b>Expression of synaptophysin</b>  | Negative                  | 0 (0%)               |
|                                     | Focal                     | 1 (6%)               |
|                                     | Diffuse                   | 18 (94%)             |
| <b>pT</b>                           | Not applicable (biopsies) | 11 (58%)             |
|                                     | 1                         | 0 (0%)               |
|                                     | 2                         | 2 (11%)              |
|                                     | 3                         | 6 (31%)              |
|                                     | 4                         | 0                    |
| <b>pN</b>                           | Not applicable (biopsies) | 11 (58%)             |
|                                     | 0                         | 1 (5%)               |
|                                     | 1                         | 2 (11%)              |
|                                     | 2                         | 5 (26%)              |
| <b>pM</b>                           | Not applicable (biopsies) | 11 (58%)             |
|                                     | 0                         | 7 (37%)              |
|                                     | 1                         | 1 (5%)               |
| <b>UICC Stage</b>                   | Not applicable (biopsies) | 11 (58%)             |
|                                     | 1                         | 1 (5%)               |
|                                     | 2                         | 0 (0%)               |

|                         |                           |           |
|-------------------------|---------------------------|-----------|
|                         | 3                         | 6 (32%)   |
|                         | 4                         | 1 (5%)    |
| <b>WHO grade</b>        | Low-grade                 | 0         |
|                         | High-grade                | 19 (100%) |
| <b>Resection margin</b> | Not applicable (biopsies) | 11 (58%)  |
|                         | R0                        | 7 (37%)   |
|                         | R1                        | 1 (5%)    |
